# Supplementary material for: A cobalt–manganese modified theophrastite phase of nickel hydroxide nanoflower arrays on nickel foam as a self-standing bifunctional electrode for overall water electrolysis
Source: Royal Society of Chemistry journal article supplement (doi:10.1039/d3se00233k), 2023-01-01
Supplement: d3se00233k1.pdf [file d3se00233k1.pdf]

## Electronic Supporting Information

# Cobalt-Manganese Modified Theophrastite Phase of Nickel Hydroxide Nanoflower Arrays on Nickel Foam as self-standing Bi-functional Electrode for Overall Water Electrolysis.

Geeta Pandurang Kharabe,<sup>a, †</sup> Rajith Illathvalappil,<sup>a, †</sup> Sidharth Barik,<sup>a, b</sup> Fayis Kanheerampockil,<sup>c, b</sup> Priyanka S. Walko,<sup>d, b</sup> Suresh K. Bhat,<sup>c, b</sup> R. Nandini Devi,<sup>d, b</sup> and Sreekumar Kurungot,<sup>\*a, b</sup>

*(a) Geeta Pandurang Kharabe, Dr. Rajith Illathvalappil, Sidharth Barik, Dr. Sreekumar Kurungot  
Physical & Materials Chemistry Division, CSIR-National Chemical Laboratory, Pune, Maharashtra, 411008 (India); Email:  
k.sreekumar@ncl.res.in*

*(b) Geeta Pandurang Kharabe, Dr. Rajith Illathvalappil, Sidharth Barik, Priyanka S. Walko, Fayis Kanheerampockil, Dr. Suresh K. Bhat, Dr. R. Nandini Devi, Dr. Sreekumar Kurungot  
Academy of Scientific and Innovative Research, Postal Staff College Area, Kamla Nehru Nagar, Ghaziabad, Uttar Pradesh-201002, India.*

*[c] Fayis Kanheerampockil, Dr. Suresh K. Bhat  
Polymer Science and Engineering Division  
CSIR-National Chemical Laboratory, Pune, Maharashtra, 411008 (India)*

*(d) Priyanka S. Walko, Dr. R. Nandini Devi  
Catalysis and Inorganic Chemistry Division  
CSIR-National Chemical Laboratory, Pune, Maharashtra, 411008 (India)*

*† These authors contributed equally to this work.*

## Table and Contents

|                                                                                                                                                                                                                                                                                                               |     |
|---------------------------------------------------------------------------------------------------------------------------------------------------------------------------------------------------------------------------------------------------------------------------------------------------------------|-----|
| <b>Fig. S1:</b> Digital Photograph analysis.....                                                                                                                                                                                                                                                              | S4  |
| <b>Fig. S2:</b> FE-SEM analysis .....                                                                                                                                                                                                                                                                         | S5  |
| <b>Fig. S3:</b> FE-SEM analysis .....                                                                                                                                                                                                                                                                         | S5  |
| <b>Fig. S4:</b> FE-SEM and Tomography analysis .....                                                                                                                                                                                                                                                          | S6  |
| <b>Fig. S5:</b> HR-TEM EDX and SEM EDX.....                                                                                                                                                                                                                                                                   | S6  |
| <b>Fig. S6:</b> TEM analysis of $\text{Co}(\text{OH})_2/\text{NF}$ and corresponding SAED pattern.....                                                                                                                                                                                                        | S7  |
| <b>Fig. S7:</b> TEM analysis of $\text{Mn}(\text{OH})_2/\text{NF}$ and corresponding SAED pattern .....                                                                                                                                                                                                       | S7  |
| <b>Fig. S8:</b> Comparative XRD patterns of $(\text{Co}_{0.3}\text{Mn}_{0.1}\text{Ni}_{0.6})\text{(OH)}_2/\text{NF}$ , $\text{Co}(\text{OH})_2/\text{NF}$ , and $\text{Ni}(\text{OH})_2/\text{NF}$ and Raman spectrum .....                                                                                   | S8  |
| <b>Fig. S9:</b> The contact angle measurement of (a) $\text{Ni}(\text{OH})_2/\text{NF}$ , (b) $\text{Co}(\text{OH})_2/\text{NF}$ , and (c) $\text{Mn}(\text{OH})_2/\text{NF}$ .....                                                                                                                           | S8  |
| <b>Fig. S10:</b> (a) XPS survey spectrum of $(\text{Co}_{0.3}\text{Mn}_{0.1}\text{Ni}_{0.6})\text{(OH)}_2/\text{NF}$ , and (b) comparative Co 2p spectrum of $\text{Co}(\text{OH})_2/\text{NF}$ and $(\text{Co}_{0.3}\text{Mn}_{0.1}\text{Ni}_{0.6})\text{(OH)}_2/\text{NF}$ shows spin splitting value ..... | S9  |
| 1. Experimental:                                                                                                                                                                                                                                                                                              |     |
| <b>Fig. S11</b> The Hg/HgO reference electrode calibration and conversion to RHE .....                                                                                                                                                                                                                        | S10 |
| <b>Table S1:</b> Comparison of the OER, HER and overall water-splitting activities of the $(\text{Co}_{0.3}\text{Mn}_{0.1}\text{Ni}_{0.6})\text{(OH)}_2/\text{NF}$ , $\text{CoMn}/\text{NF}-(1:1)$ and $\text{CoMn}/\text{NF}-(2:1)$ . .....                                                                  | S11 |
| <b>Fig. S12:</b> OER and HER polarisation plots .....                                                                                                                                                                                                                                                         | S11 |

**Fig. S13:** Comparative LSV curve before and after stability testing OER .....S12

**Fig. S14.** The cyclic voltammograms recorded at different samples at different scan rates and the plot of the cathodic current density against the scan rate in the non-faradaic region of the OER CVs .....S13

**Table S2.** The  $C_{dl}$  values recorded for OER.....S13

**Fig. S15:** The cyclic voltammograms recorded at different samples at different scan rates and the plot of the cathodic current density against the scan rate in the non-faradaic region of the HER CVs.....S14

**Table S3.** The  $C_{dl}$  values recorded for HER.....S14

**Fig. S16.** Comparative OWS of  $(Co_{0.3}Mn_{0.1}Ni_{0.6})(OH)_2/NF$ ,  $CoMn/NF-(1:1)$  and  $CoMn/NF-(2:1)$ . .....S15

**Fig. S17:** Gas chromatography analysis.....S15

**Fig. S18:** Post OWS FE-SEM analysis.....S16

**Fig. S19.** Post-analysis of the electrodes (XRD) after the overall water-splitting experiment of the  $(Co_{0.3}Mn_{0.1}Ni_{0.6})(OH)_2/NF$  anode (red) and cathode (green).....S17

**Figure S20.** Post-analysis of the electrodes (XPS) after the overall water-splitting .....S18

**Table S4:** Comparison of the OER, HER and overall water-splitting activities of the reported systems vs the in-house system.....S19

**2. References.....S20**

1. Experimental:

### 1.1. Details of GC specifications

The amount of H<sub>2</sub> and O<sub>2</sub> evolved was determined using gas chromatography (5700 Nucon gas chromatograph with Carbosphere column and Ar as carrier gas) with a thermal conductivity detector. The program used in GC for all the analyses involved the detector temperature of 100 °C and oven temperature of 50 °C at the time of injection. A gas phase syringe (injection volume of 500 μL).

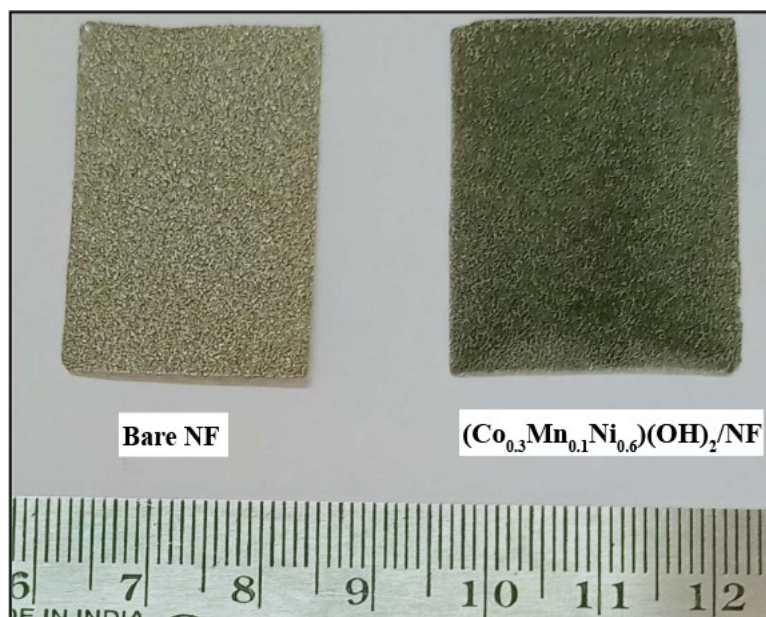

**Figure S1.** Digital photograph of Bare NF and (Co<sub>0.3</sub>Mn<sub>0.1</sub>Ni<sub>0.6</sub>)(OH)<sub>2</sub>/NF.

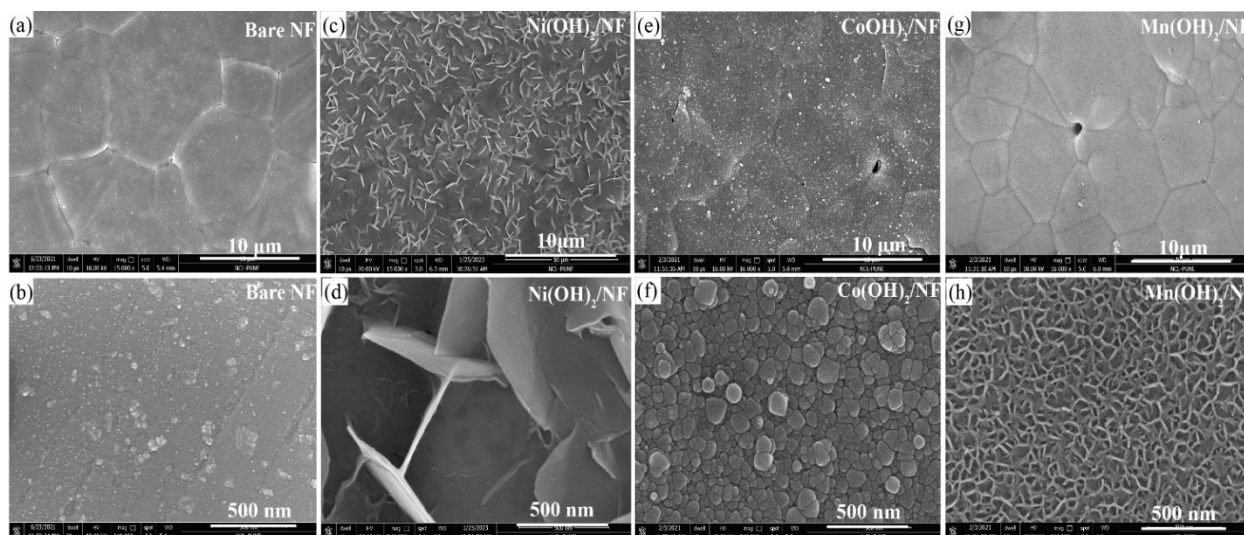

**Figure S2.** The FE-SEM images recorded at different magnifications of (a-b) Bare NF, (c-d) Ni(OH)<sub>2</sub>/NF, (e-f) Co(OH)<sub>2</sub>/NF, and (g-h) Mn(OH)<sub>2</sub>/NF.

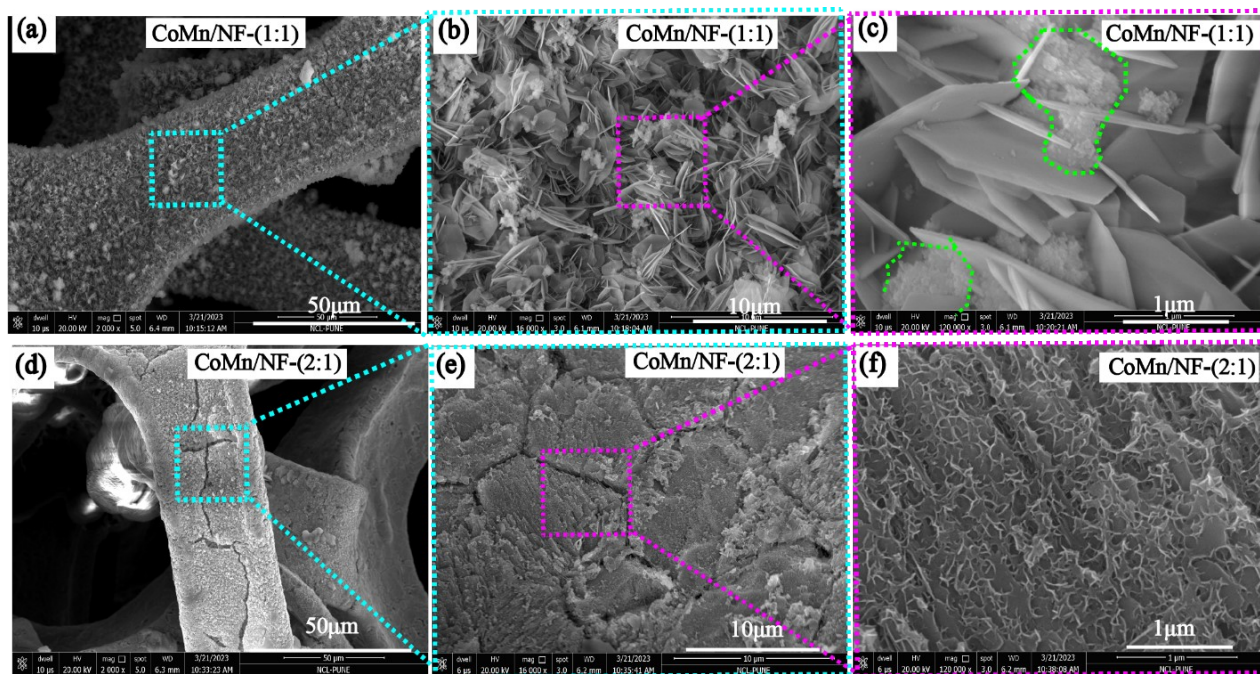

**Figure S3.** FE-SEM images: (a) the relatively rough surface of (CoMn)/NF-(1:1), (b) the magnified image of the portion marked in the square in (a), (c) the sheet-like morphology with randomly oriented structure, (d) the rough surface morphology of (CoMn)/NF-(2:1), (e) the magnified image of the portion marked in the square in (d) and (f) the high-magnified image of (CoMn)/NF-(2:1) with the stacked-type morphology.

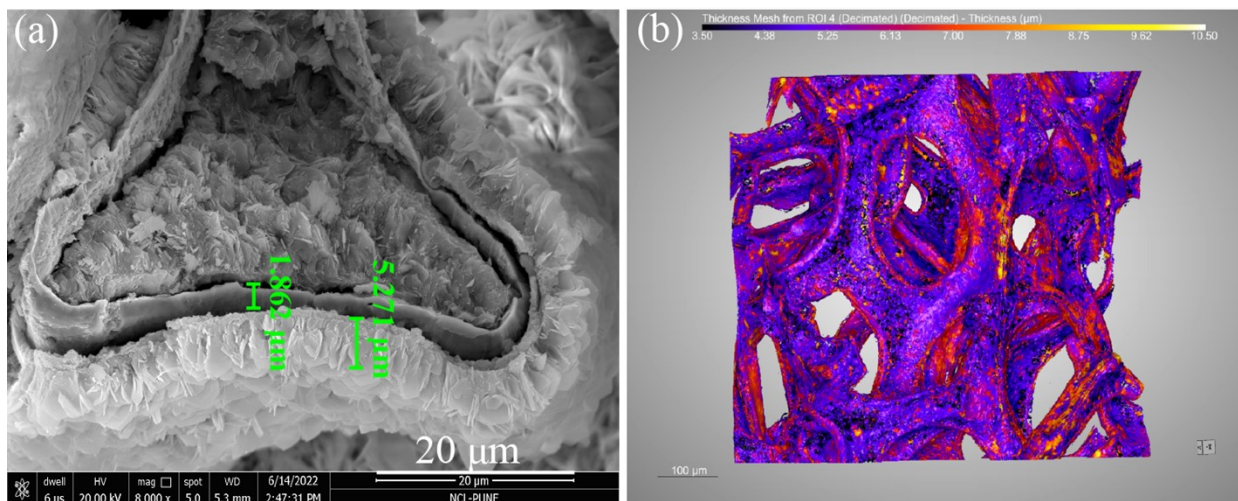

**Figure S4.** (a) FESEM and (b) colour-coded thickness profile obtained from the tomography images of  $(\text{Co}_{0.3}\text{Mn}_{0.1}\text{Ni}_{0.6})(\text{OH})_2/\text{NF}$ .

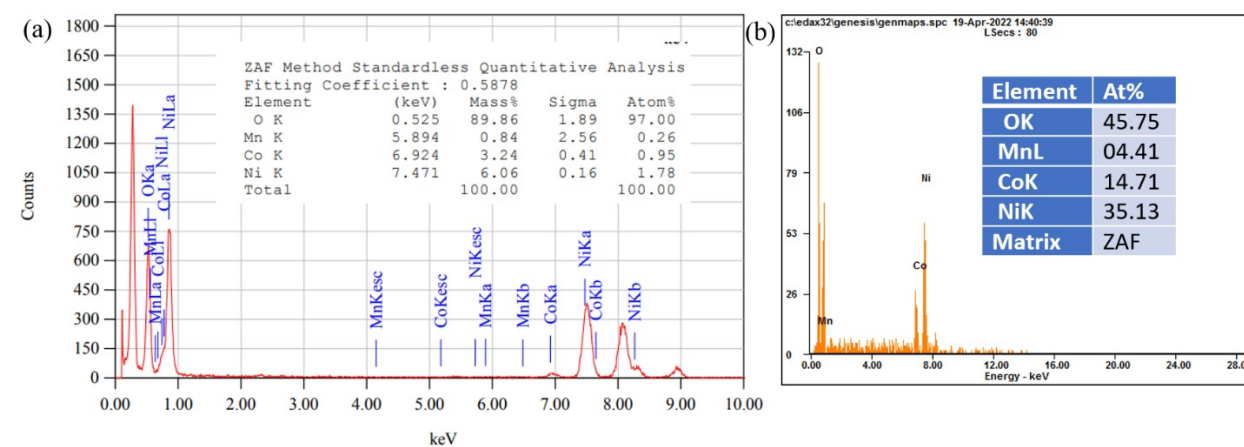

**Figure S5:** (a) HR-TEM-EDX of  $(\text{Co}_{0.3}\text{Mn}_{0.1}\text{Ni}_{0.6})(\text{OH})_2/\text{NF}$  and (b) SEM-EDX of  $(\text{Co}_{0.3}\text{Mn}_{0.1}\text{Ni}_{0.6})(\text{OH})_2/\text{NF}$ .

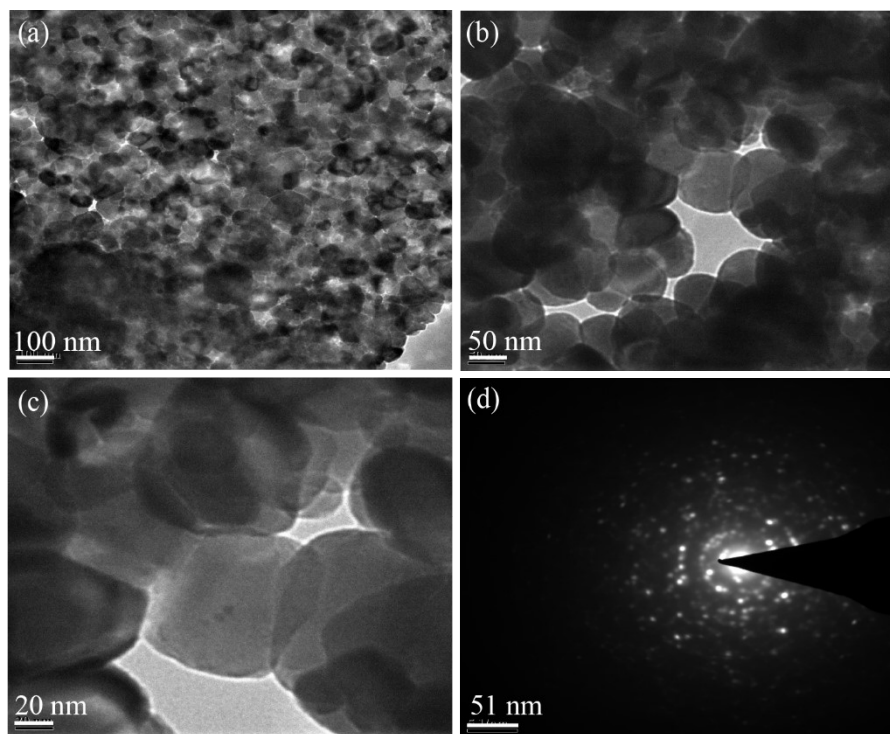

**Figure S6.** (a-c) TEM images of  $\text{Co(OH)}_2/\text{NF}$  recorded at different magnifications and (d) the corresponding SAED pattern.

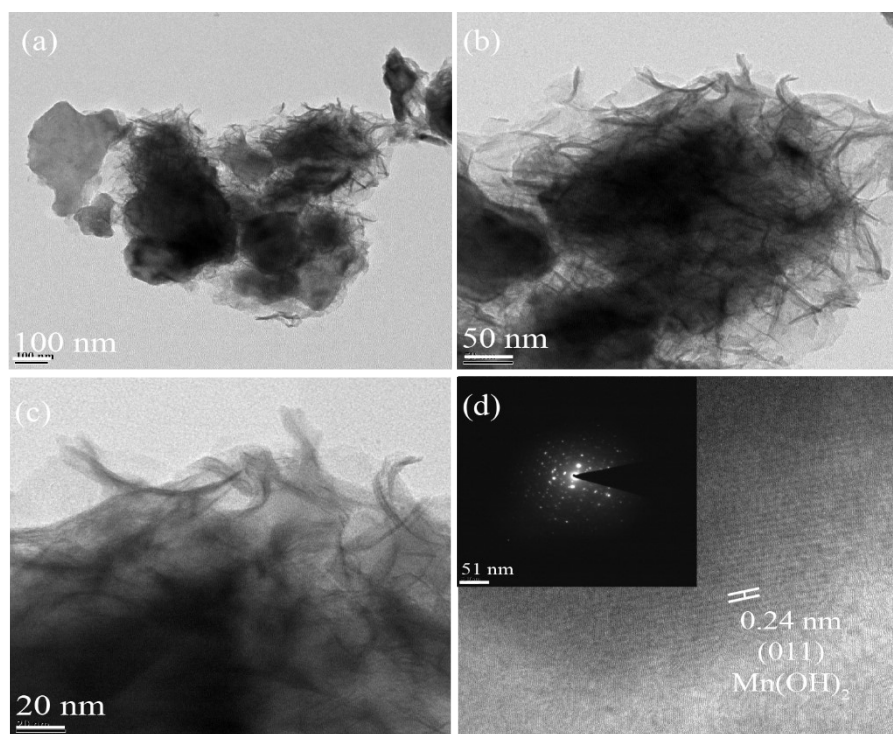

**Figure S7.** (a-c) TEM images of  $\text{Mn(OH)}_2/\text{NF}$  recorded at different magnifications and (d) inset shows SAED pattern of  $\text{Mn(OH)}_2/\text{NF}$  indicates the crystalline nature.

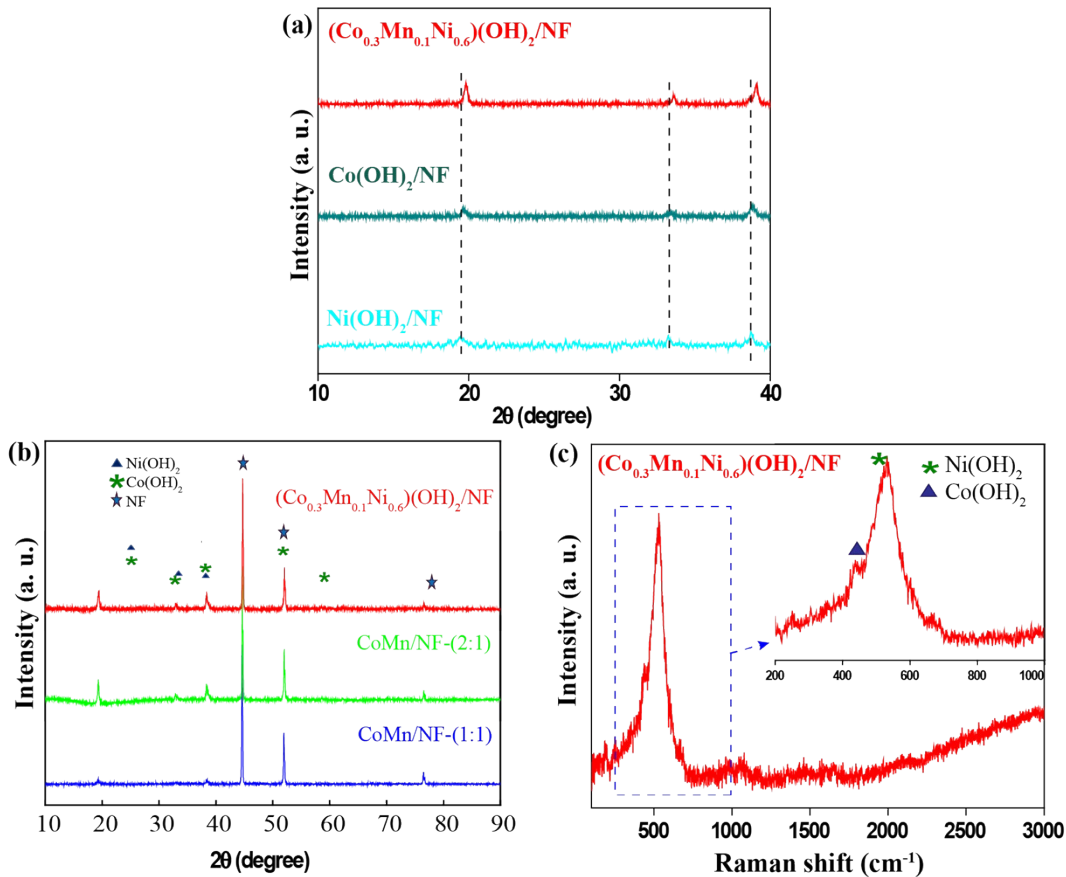

**Figure S8.** (a) Comparative XRD patterns of  $(\text{Co}_{0.3}\text{Mn}_{0.1}\text{Ni}_{0.6})(\text{OH})_2/\text{NF}$ ,  $\text{Co}(\text{OH})_2/\text{NF}$ , and  $\text{Ni}(\text{OH})_2/\text{NF}$ , (b) comparative XRD profiles of  $(\text{Co}_{0.3}\text{Mn}_{0.1}\text{Ni}_{0.6})(\text{OH})_2/\text{NF}$ ,  $\text{CoMn/NF-(1:1)}$  and  $\text{CoMn/NF-(2:1)}$ , and (c) Raman spectrum of  $(\text{Co}_{0.3}\text{Mn}_{0.1}\text{Ni}_{0.6})(\text{OH})_2/\text{NF}$ .

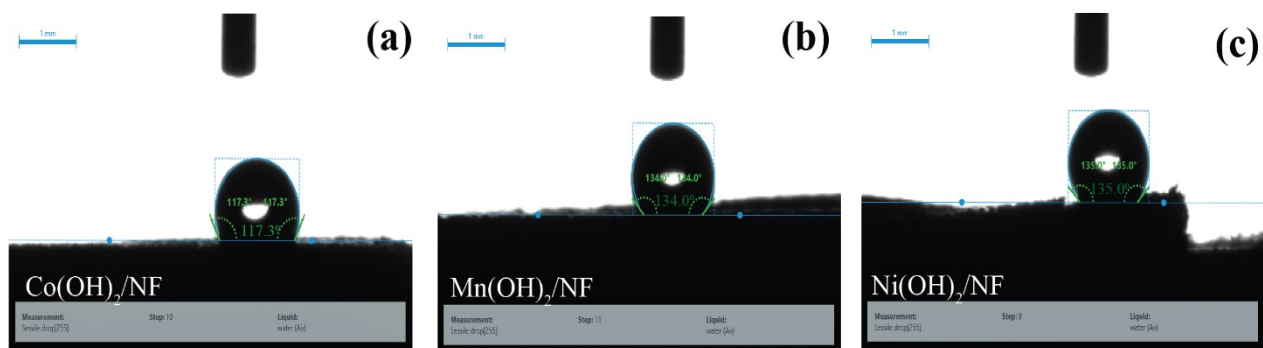

**Figure S9:** The contact angle measurement of (a)  $\text{Co}(\text{OH})_2/\text{NF}$ , (b)  $\text{Mn}(\text{OH})_2/\text{NF}$ , and (c)  $\text{Ni}(\text{OH})_2/\text{NF}$ .



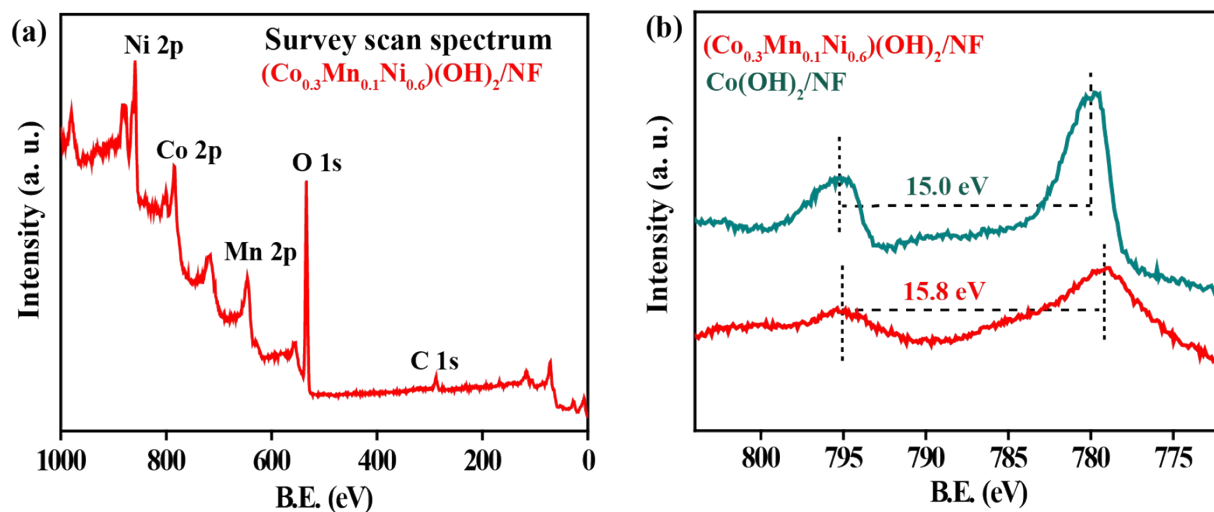

**Figure S10:** (a) XPS survey spectrum of  $(\text{Co}_{0.3}\text{Mn}_{0.1}\text{Ni}_{0.6})(\text{OH})_2/\text{NF}$ , and (b) the comparative XPS spectra of Co 2p in  $\text{Co}(\text{OH})_2/\text{NF}$  and  $(\text{Co}_{0.3}\text{Mn}_{0.1}\text{Ni}_{0.6})(\text{OH})_2/\text{NF}$  with the spin splitting values.

*OER Reaction Pathway:*

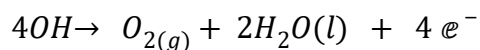

The OER reaction mechanism in the alkaline medium follows three elementary steps:

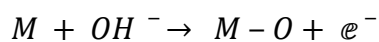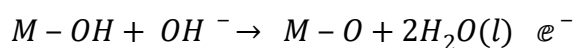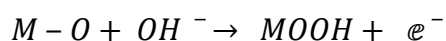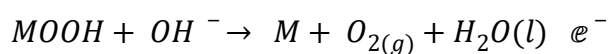

*The HER Reaction Pathway:*

The general HER mechanism in the alkaline medium follows three elementary steps:

Volmer step:

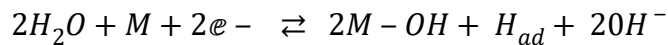

Second Heyrovsky step:

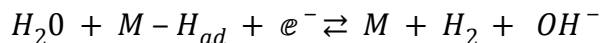

Or the Tafel recombination step:

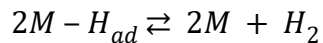

### 1.2. The Hg/HgO reference electrode calibration and conversion to RHE:

The Hg/HgO electrode was calibrated according to our previous report.<sup>1</sup> By utilizing a 3-electrode setup consisting of a platinum RDE electrode, graphite rod, and Hg/HgO as the working electrode (WE), counter electrode (CE), and reference electrode (RE), respectively, in an H<sub>2</sub>-saturated 1M KOH electrolyte. The potential when the current crossed the zero point during the linear sweep voltammogram (LSV) measurement at a scan rate of 0.50 mV/s was taken as the thermodynamic potential for the hydrogen electrode reactions. This potential in the present case was found to be at 0.913 V. Henceforth, for the conversion of the voltage recorded as for Hg/HgO to the RHE scale, the below equation is used:

$$E(\text{RHE}) = E(\text{Hg/HgO}) + 0.913 \text{ V} \dots\dots\dots 1$$

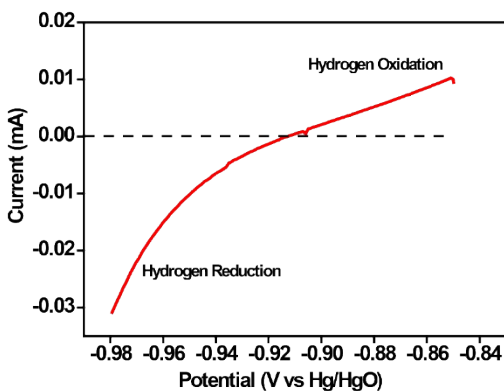

**Figure S11.** Calibration of Hg/HgO reference electrode in 1 M KOH solution.

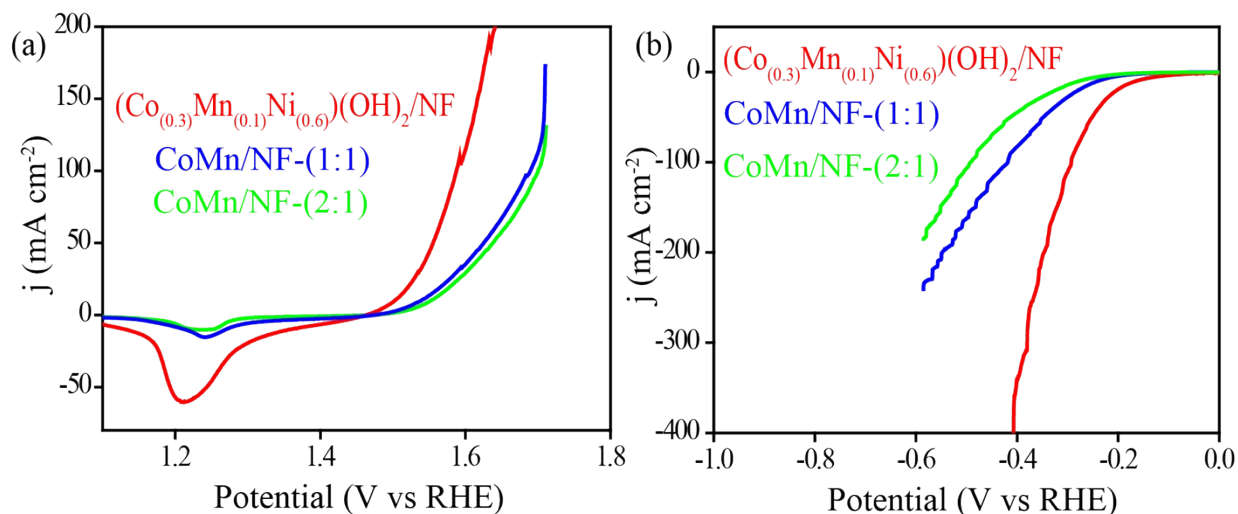

**Figure S12.** (a) The OER polarisation plots of  $(\text{Co}_{0.3}\text{Mn}_{0.1}\text{Ni}_{0.6})(\text{OH})_2/\text{NF}$ ,  $\text{CoMn}/\text{NF}-(1:1)$  and  $\text{CoMn}/\text{NF}-(2:1)$  performed in 1 M KOH electrolyte, (b) the HER polarisation plots of  $(\text{Co}_{0.3}\text{Mn}_{0.1}\text{Ni}_{0.6})(\text{OH})_2/\text{NF}$ ,  $\text{CoMn}/\text{NF}-(1:1)$  and  $\text{CoMn}/\text{NF}-(2:1)$  performed in 1 M KOH electrolyte.

**Table S1:** Comparison of the OER, HER and the overall water-splitting activities of the  $(\text{Co}_{0.3}\text{Mn}_{0.1}\text{Ni}_{0.6})(\text{OH})_2/\text{NF}$ ,  $\text{CoMn}/\text{NF}-(1:1)$  and  $\text{CoMn}/\text{NF}-(2:1)$ .

| Sr. No. | Electrocatalyst                                                          | Electrolyte | OER Potential (mV) @ $10\text{mA cm}^{-2}$ | HER Potential (mV) @ $10\text{mA cm}^{-2}$ | OWS Potential (V) @ $10\text{mA cm}^{-2}$ |
|---------|--------------------------------------------------------------------------|-------------|--------------------------------------------|--------------------------------------------|-------------------------------------------|
| 1.      | $\text{CoMn}/\text{NF}-(1:1)$                                            | 1 M KOH     | 310                                        | 242                                        | 1.75                                      |
| 2.      | $\text{CoMn}/\text{NF}-(2:1)$                                            | 1 M KOH     | 320                                        | 286                                        | 1.81                                      |
| 3.      | $(\text{Co}_{0.3}\text{Mn}_{0.1}\text{Ni}_{0.6})(\text{OH})_2/\text{NF}$ | 1 M KOH     | 270                                        | 163                                        | 1.62                                      |

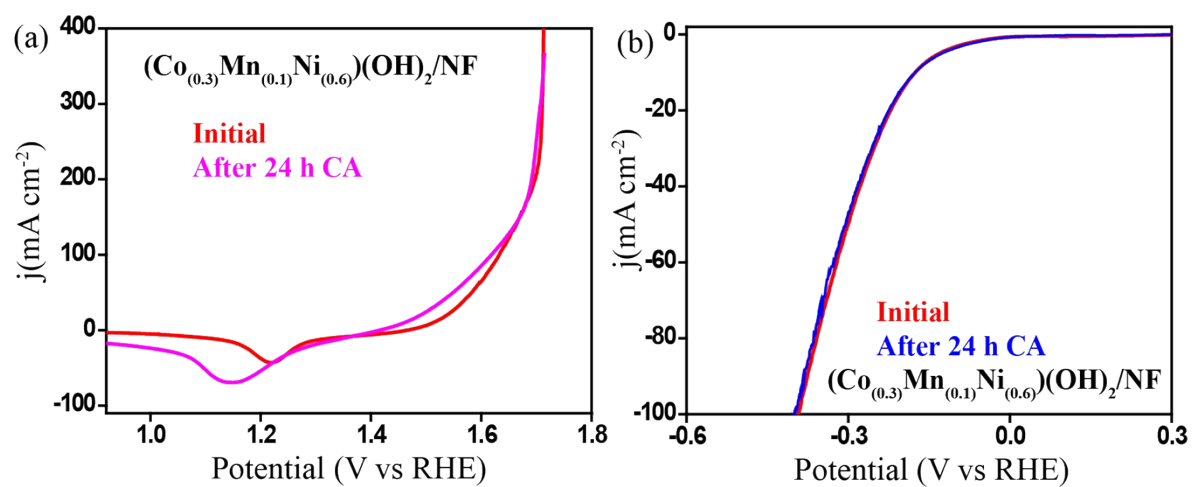

**Figure S13:** The comparative LSVs of  $(\text{Co}_{0.3}\text{Mn}_{0.1}\text{Ni}_{0.6})(\text{OH})_2/\text{NF}$  recorded in 1M KOH before and after the stability testing: (a) OER and (b) HER.

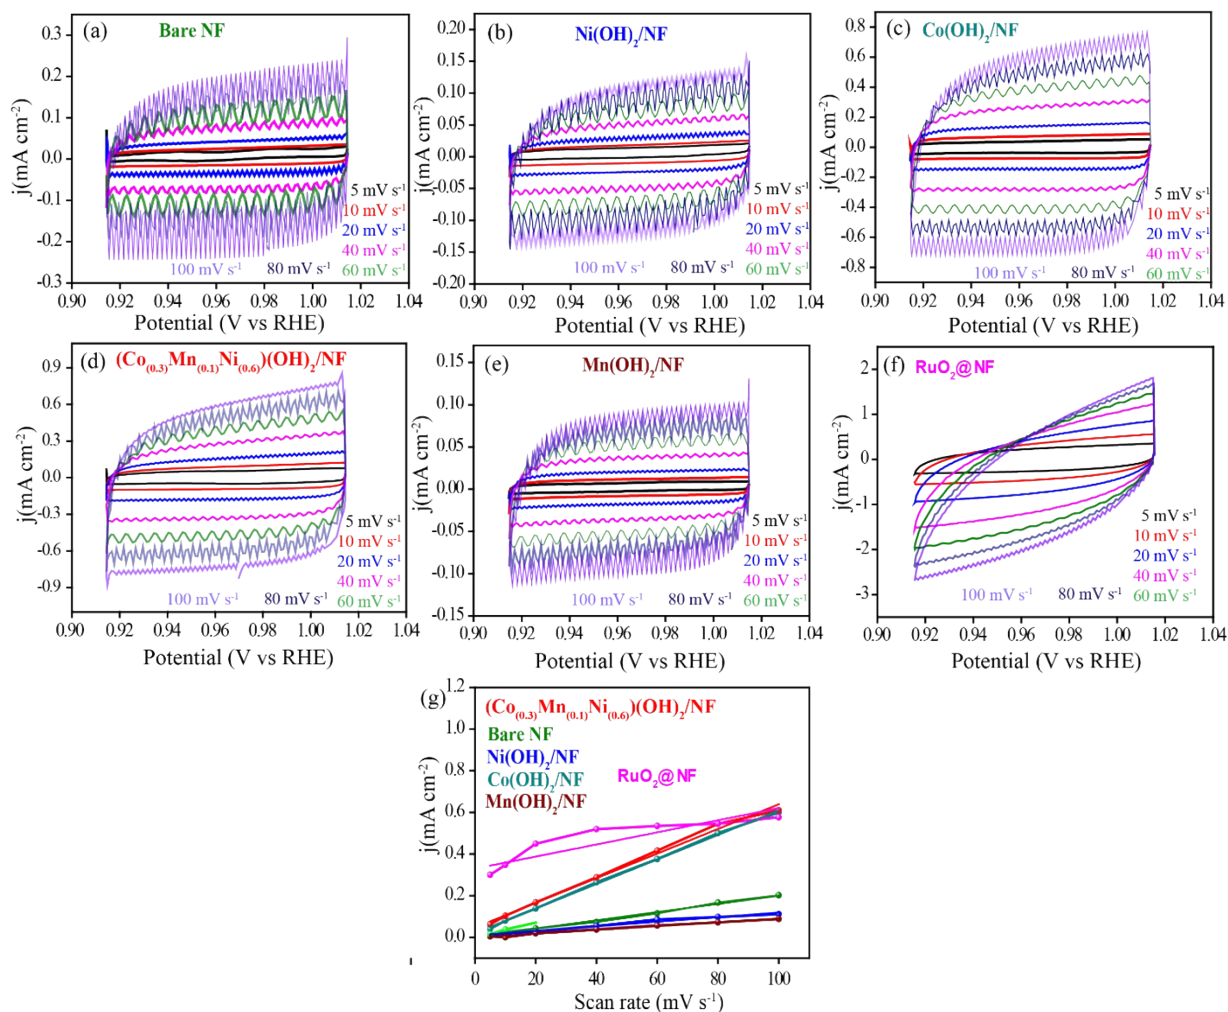

**Figure S14.** The cyclic voltammograms recorded at different scan rates: (a) Bare NF, (b) Ni(OH)<sub>2</sub>/NF, (c) Co(OH)<sub>2</sub>/NF, (d) (Co<sub>0.3</sub>Mn<sub>0.1</sub>Ni<sub>0.6</sub>)(OH)<sub>2</sub>/NF, (e) Mn(OH)<sub>2</sub>/NF, (f) RuO<sub>2</sub>@NF, and (g) the plots of the cathodic current density against the scan rate in the non-Faradaic region of 0.915 to 1.015 V vs. RHE.

**Table S2.** The  $C_{dl}$  values recorded for OER.

| Sample                  | $C_{dl}$ OER (mF cm <sup>-1</sup> ) |
|-------------------------|-------------------------------------|
| Bare NF                 | 1.9                                 |
| Ni(OH) <sub>2</sub> /NF | 1.1                                 |
| Co(OH) <sub>2</sub> /NF | 5.8                                 |
| Mn(OH) <sub>2</sub> /NF | 0.91                                |

|                                                                              |      |
|------------------------------------------------------------------------------|------|
| $\text{Co}_{(0.3)}\text{Mn}_{(0.1)}\text{Ni}_{(0.6)}(\text{OH})_2/\text{NF}$ | 5.92 |
| $\text{RuO}_2@\text{NF}$                                                     | 2.91 |

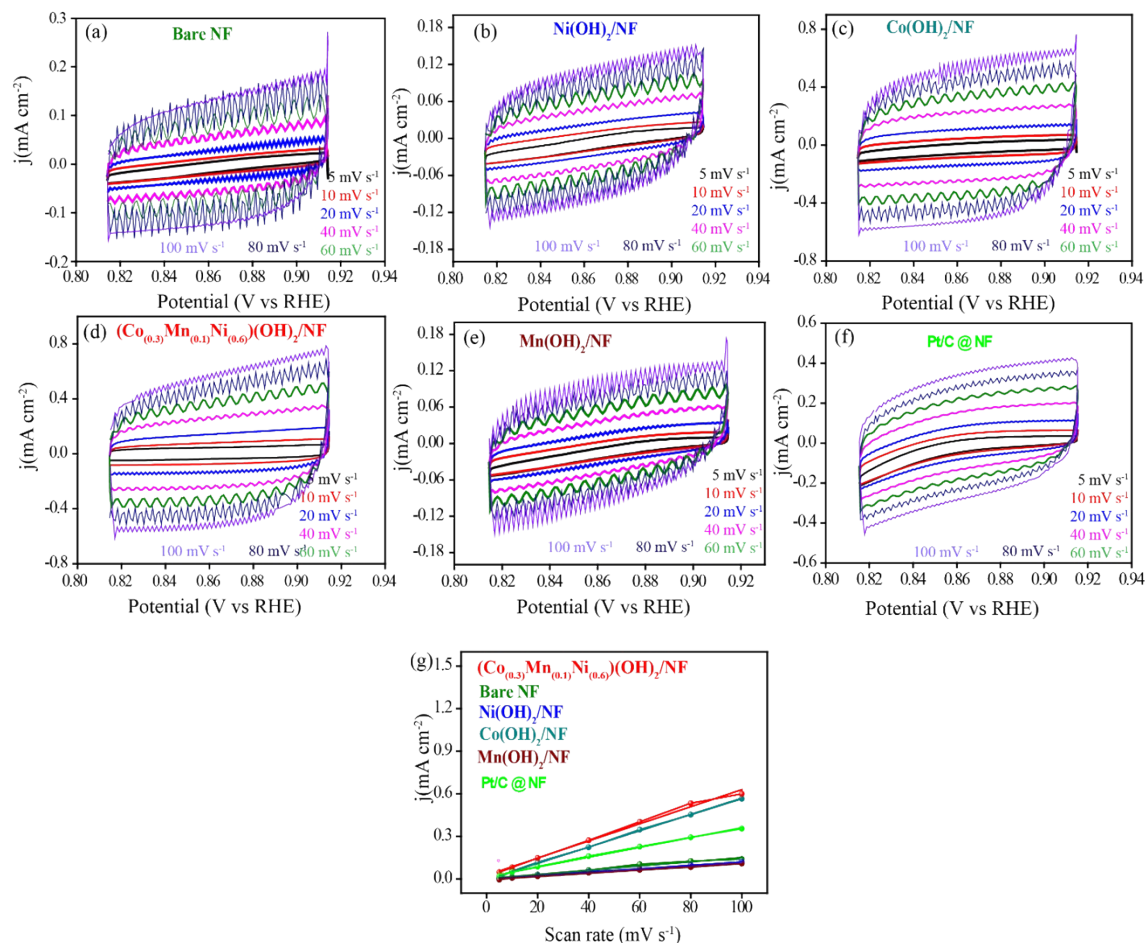

**Figure S15.** The cyclic voltammograms recorded at different scan rates: (a) Bare NF, (b) Ni(OH)<sub>2</sub>/NF, (c) Co(OH)<sub>2</sub>/NF, (d) (Co<sub>0.3</sub>Mn<sub>0.1</sub>Ni<sub>0.6</sub>)(OH)<sub>2</sub>/NF, (e) Mn(OH)<sub>2</sub>/NF, (f) Pt/C@NF, and (g) the plots of the cathodic current density against the scan rate in the non-Faradaic region of 0.915 to 0.815 V vs. RHE.

**Table S3.** The  $C_{dl}$  values recorded for HER

| Sample  | $C_{dl, HER}$ (mF cm <sup>-1</sup> ) |
|---------|--------------------------------------|
| Bare NF | 1.49                                 |

|                                                                             |      |
|-----------------------------------------------------------------------------|------|
| Ni(OH) <sub>2</sub> /NF                                                     | 1.23 |
| Co(OH) <sub>2</sub> /NF                                                     | 5.75 |
| Mn(OH) <sub>2</sub> /NF                                                     | 1.14 |
| Co <sub>0.3</sub> Mn <sub>0.1</sub> Ni <sub>0.6</sub> (OH) <sub>2</sub> /NF | 6.03 |
| Pt/C@NF                                                                     | 3.48 |

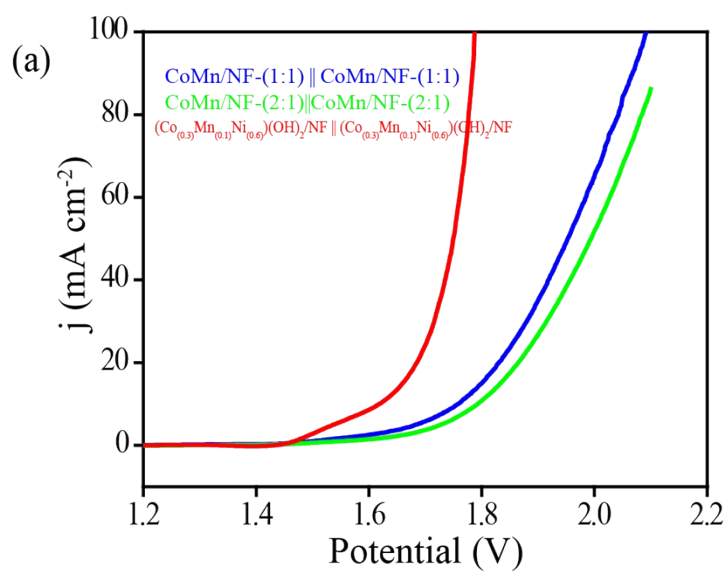

**Figure S16.** The comparative LSV plots corresponding to the overall water splitting of (Co<sub>0.3</sub>Mn<sub>0.1</sub>Ni<sub>0.6</sub>)(OH)<sub>2</sub>/NF, CoMn/NF-(1:1) and CoMn/NF-(2:1).

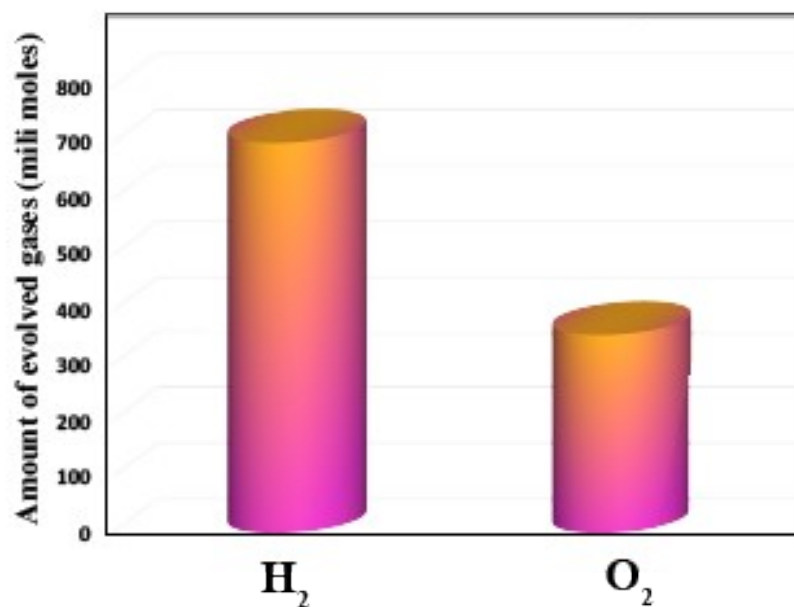

**Figure S17.** Gas chromatography analysis: the bar diagram shows the amount of the evolved hydrogen and oxygen during the water electrolysis using  $(\text{Co}_{0.3}\text{Mn}_{0.1}\text{Ni}_{0.6})(\text{OH})_2/\text{NF}$  as the anode and cathode.

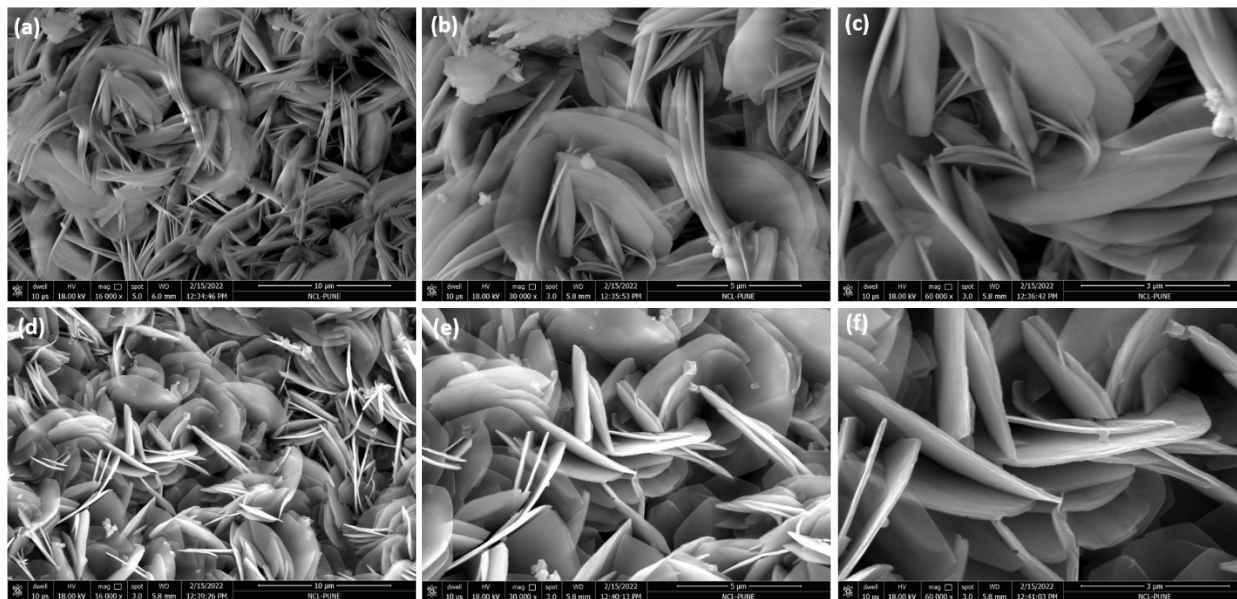

**Figure S18.** Post-analysis of the electrodes after the overall water-splitting experiment: (a, b, c) the  $(\text{Co}_{0.3}\text{Mn}_{0.1}\text{Ni}_{0.6})(\text{OH})_2/\text{NF}$  anode and (d, e, f) the  $(\text{Co}_{0.3}\text{Mn}_{0.1}\text{Ni}_{0.6})(\text{OH})_2/\text{NF}$  cathode.

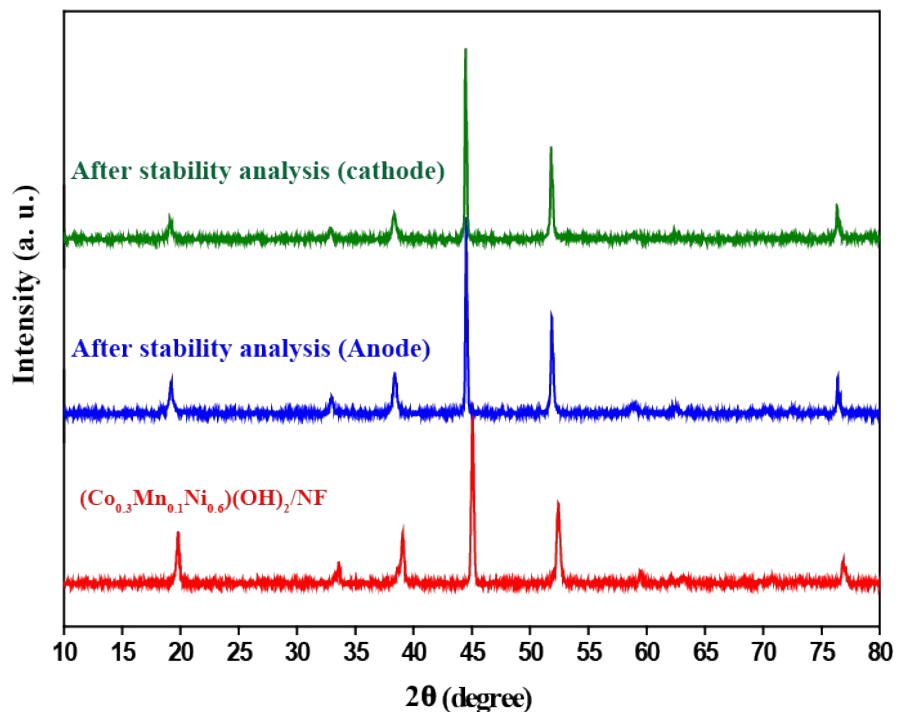



**Figure S19.** Post-analysis of the electrodes after the overall water-splitting experiment of the  $(\text{Co}_{0.3}\text{Mn}_{0.1}\text{Ni}_{0.6})(\text{OH})_2/\text{NF}$  anode (red) and cathode (green).

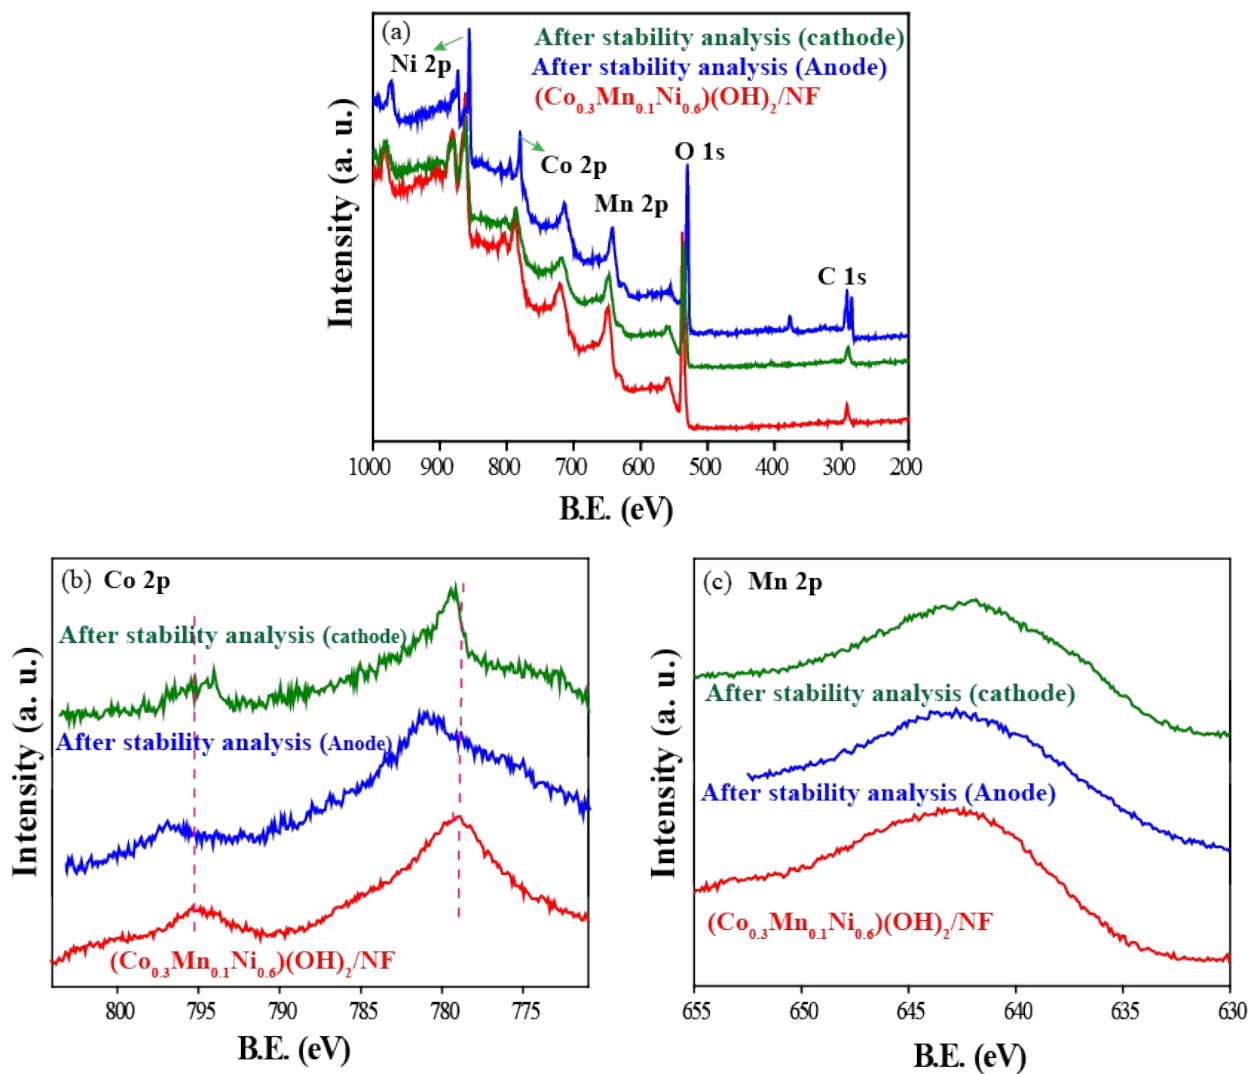

**Figure S20.** Post-analysis of the electrodes after the overall water-splitting: (a) survey scan spectra, (b) the Co 2p of the  $(\text{Co}_{0.3}\text{Mn}_{0.1}\text{Ni}_{0.6})(\text{OH})_2/\text{NF}$  (red), anode after stability (blue) and cathode after stability (green) and (c) the Mn 2p  $(\text{Co}_{0.3}\text{Mn}_{0.1}\text{Ni}_{0.6})(\text{OH})_2/\text{NF}$  (red) anode after stability (blue) and cathode after stability (green).

**Table S4:** Comparison of the OER, HER and overall water-splitting activities of the reported systems vs the in-house system.

| Sr. No. | Electrocatalyst                                                              | Electrolyte    | OER Potential @ 10mA cm <sup>-2</sup> | HER Potential @ 10mA cm <sup>-2</sup> | Potential @ 10mA cm <sup>-2</sup> | References       |
|---------|------------------------------------------------------------------------------|----------------|---------------------------------------|---------------------------------------|-----------------------------------|------------------|
| 1.      | NiCo–NiCoO <sub>2</sub> @NC                                                  | 1 M KOH        | 318 mV                                | 94 mV                                 | 1.44 V                            | 2                |
| 2.      | CoS/Co(OH) <sub>2</sub> @MoS <sub>2</sub>                                    | 1 M KOH        | 380 mV                                | 143 mV                                | 1.58 V                            | 3                |
| 3.      | VCoCO <sub>x</sub> @NF                                                       | 1 M KOH        | 240 mV                                | 63 mV                                 | 1.54 V                            | 4                |
| 4.      | Ni/Ni(OH) <sub>2</sub> -NiCo <sub>2</sub> O <sub>4</sub> /NF                 | 1 M KOH        | 235 mV                                | 53 mV                                 | 1.51 V                            | 5                |
| 5.      | Ni(OH) <sub>2</sub> @Ni/CC                                                   | 1 M KOH        | -                                     | -                                     | 1.58 V                            | 6                |
| 6.      | Al-CoP/CC                                                                    | 1 M KOH        | 265 mV                                | 52 mV                                 | 1.56 V                            | 7                |
| 7.      | Ni/Ni <sub>8</sub> P <sub>3</sub>                                            | 1 M KOH        | 270 mV @ 30 mA cm <sup>-2</sup>       | 130 mV                                | 1.61 V                            | 8                |
| 8.      | Co <sub>3</sub> O <sub>4</sub> -MTA/NF                                       | 1 M NaOH       | 152 mV                                | 98 mV                                 | 1.63 V                            | 9                |
| 9.      | Ni <sub>x</sub> Co <sub>3-x</sub> O <sub>4</sub>    NiCo/NiCoO <sub>x</sub>  | 1 M KOH        | 337 mV                                | 155 mV                                | 1.75 V                            | 10               |
| 10.     | NiCoP/NF                                                                     | 1 M KOH        | 308 mV @ 50 mA cm <sup>-2</sup>       | 133 mV @ 50 mA cm <sup>-2</sup>       | 1.77 V                            | 11               |
| 11.     | <b>(Co<sub>0.3</sub>Mn<sub>0.1</sub>Ni<sub>0.6</sub>)(OH)<sub>2</sub>/NF</b> | <b>1 M KOH</b> | <b>270 mV</b>                         | <b>163 mV</b>                         | <b>1.62 V</b>                     | <b>This work</b> |

## 2. References

1. S. K. Singh, V. Kashyap, N. Manna, S. N. Bhange, R. Soni, R. Boukherroub, S. Szunerits and S. Kurungot, *ACS Catal.*, 2017, **7**, 6700-6710.
2. Y. Xiao, P. Zhang, X. Zhang, X. Dai, Y. Ma, Y. Wang, Y. Jiang, M. Liu and Y. Wang, *J. Mater. Chem. A*, 2017, **5**, 15901-15912.
3. T. Yoon and K. S. Kim, *Adv. Funct. Mater.*, 2016, **26**, 7386-7393.
4. A. Meena, P. Thangavel, A. S. Nissimagoudar, A. Narayan Singh, A. Jana, D. Sol Jeong, H. Im and K. S. Kim, *Chem. Eng. J.*, 2022, **430**, 132623.
5. Y. Yu, C. Chen, Y. Liu, H. Yu, S. Li, Y. Xue, N. Cai, J. Wang and F. Yu, *J. Mater. Chem. C*, 2022, **126**, 5493–5501.
6. Z. Xing, L. Gan, J. Wang and X. Yang, *J. Mater. Chem. A*, 2017, **5**, 7744-7748.
7. R. Zhang, C. Tang, R. Kong, G. Du, A. M. Asiri, L. Chen and X. Sun, *Nanoscale*, 2017, **9**, 4793-4800.
8. G.-F. Chen, T. Y. Ma, Z.-Q. Liu, N. Li, Y.-Z. Su, K. Davey and S.-Z. Qiao, *Adv. Funct. Mater.*, 2016, **26**, 3314-3323.
9. Y. P. Zhu, T. Y. Ma, M. Jaroniec and S. Z. Qiao, *Angew.Chem.Int.Ed.*, 2017, **56**, 1324-1328.
10. X. Yan, K. Li, L. Lyu, F. Song, J. He, D. Niu, L. Liu, X. Hu and X. Chen, *ACS Appl. Energy Mater.*, 2016, **8**, 3208-3214.
11. Y. Li, H. Zhang, M. Jiang, Y. Kuang, X. Sun and X. Duan, *Nano Res.*, 2016, **9**, 2251-2259.
